# Supplementary material for: Long-term impact of a ten-year intervention program on human and canine Trypanosoma cruzi infection in the Argentine Chaco
Source: PubMed Central journal article supplement (PMC8115854; doi:10.1371/journal.pntd.0009389), 2021-05-12
Supplement: pntd.0009389.s003.pdf [file pntd.0009389.s003.pdf]

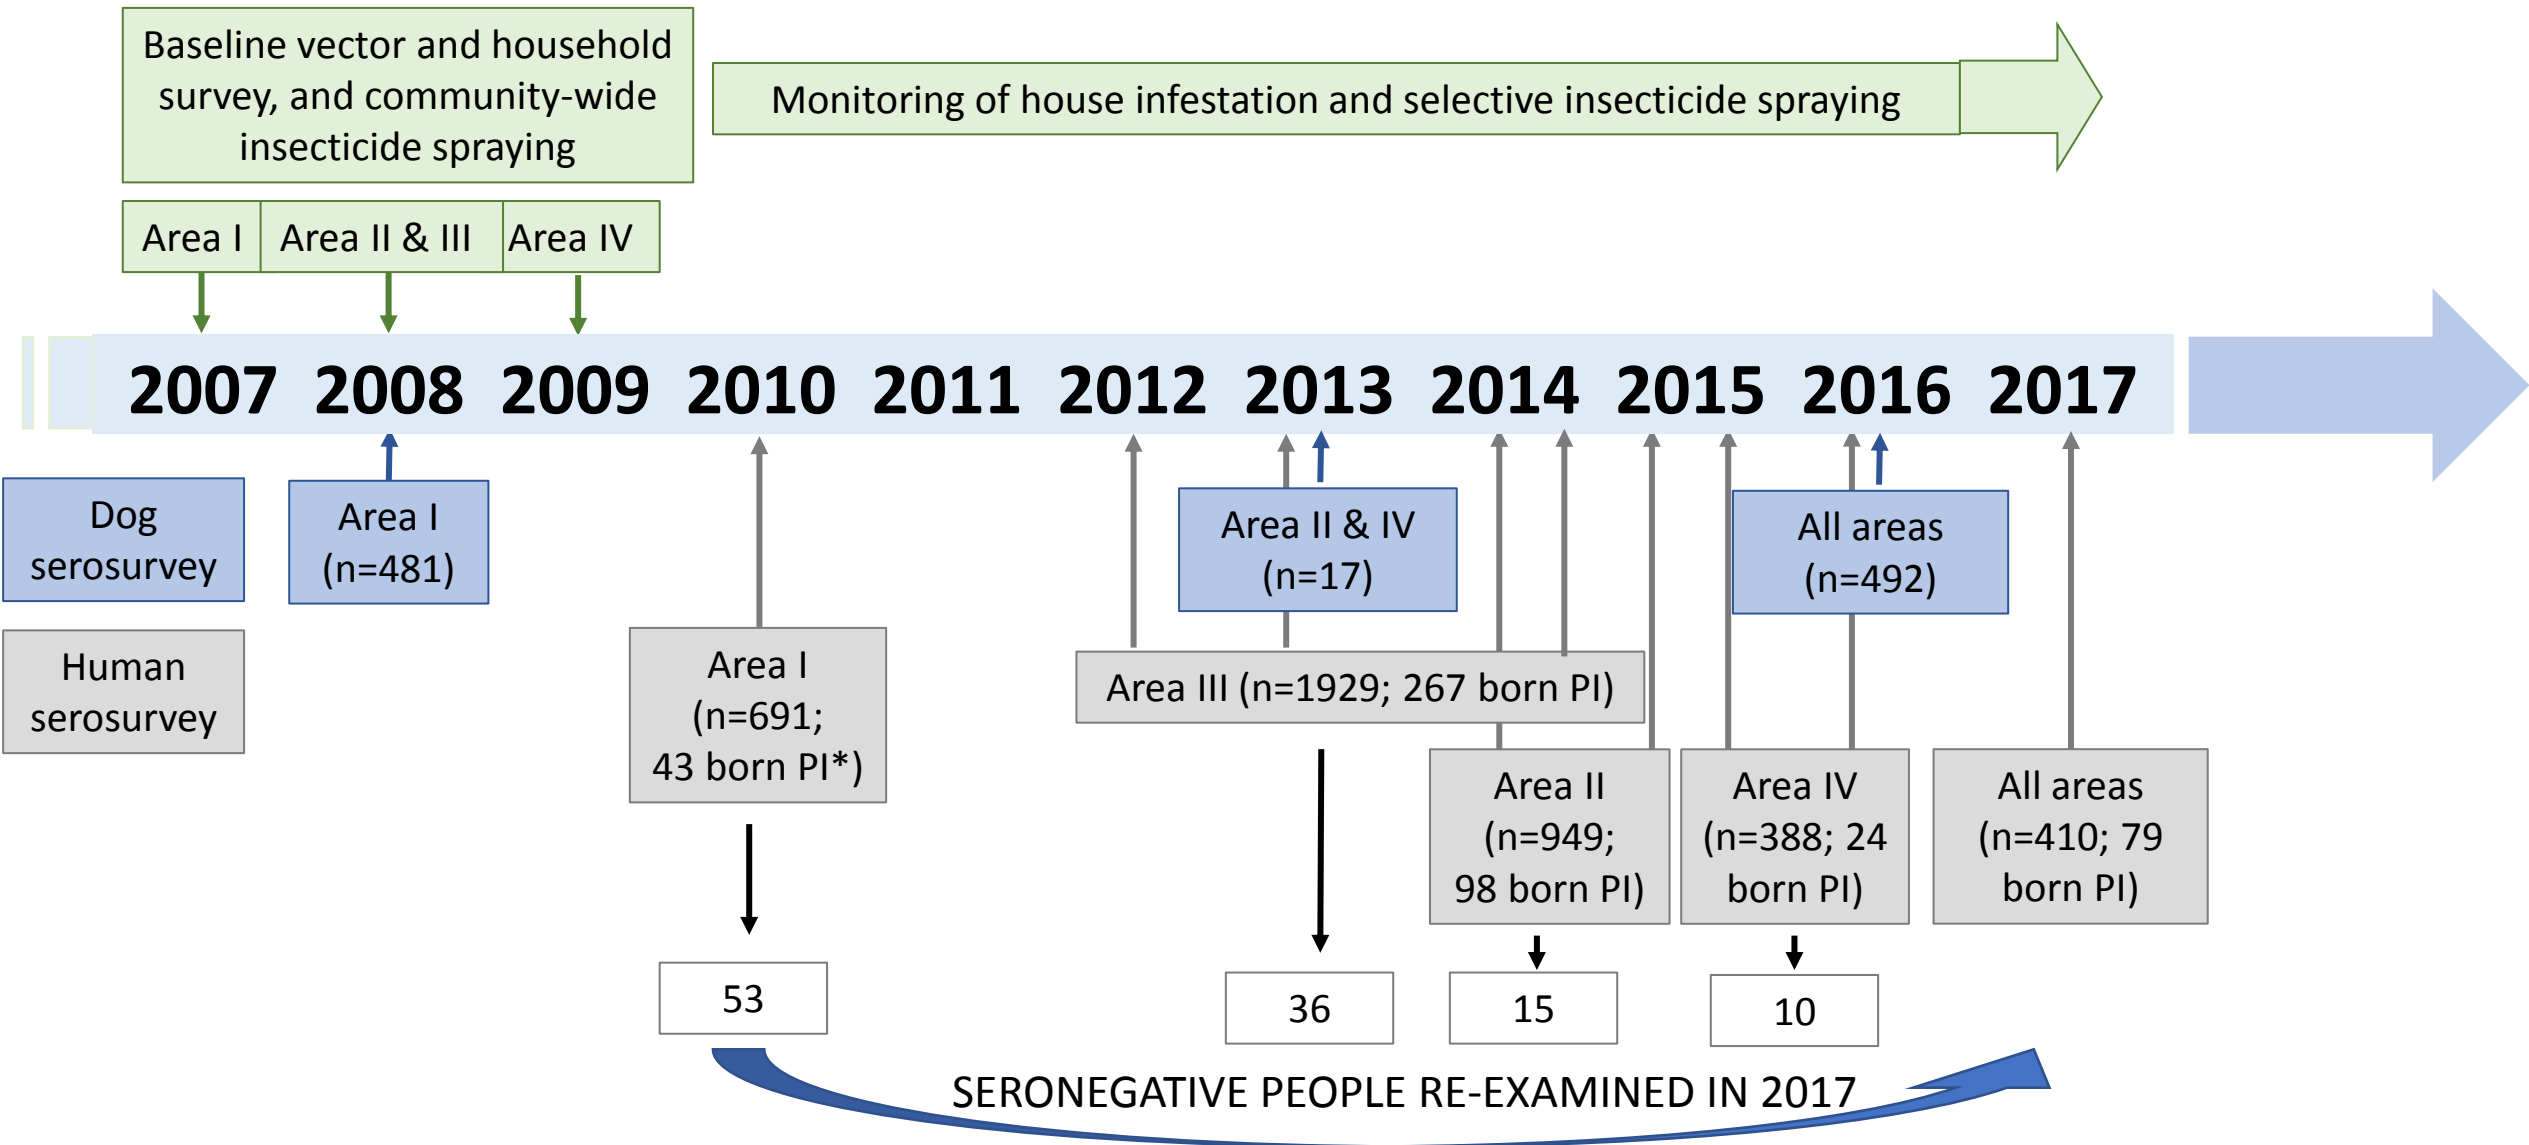

\*PI: post-interventions
