# Supplementary material for: Long-term impact of a ten-year intervention program on human and canine Trypanosoma cruzi infection in the Argentine Chaco
Source: PubMed Central journal article supplement (PMC8115854; doi:10.1371/journal.pntd.0009389), 2021-05-12
Supplement: pntd.0009389.s004.pdf [file pntd.0009389.s004.pdf]

Houses with examined dogs and humans according to risk stratification

Dog serosurvey  
N=151

Human serosurvey  
N=180

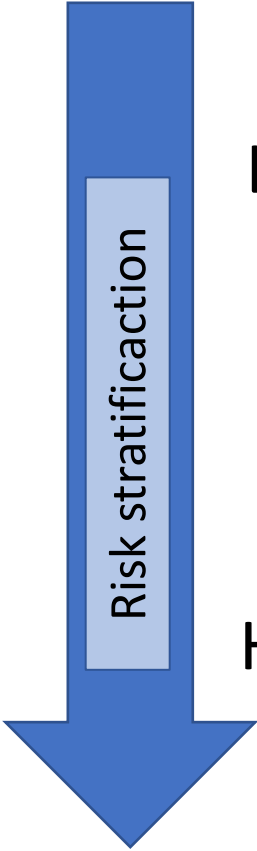

LOW

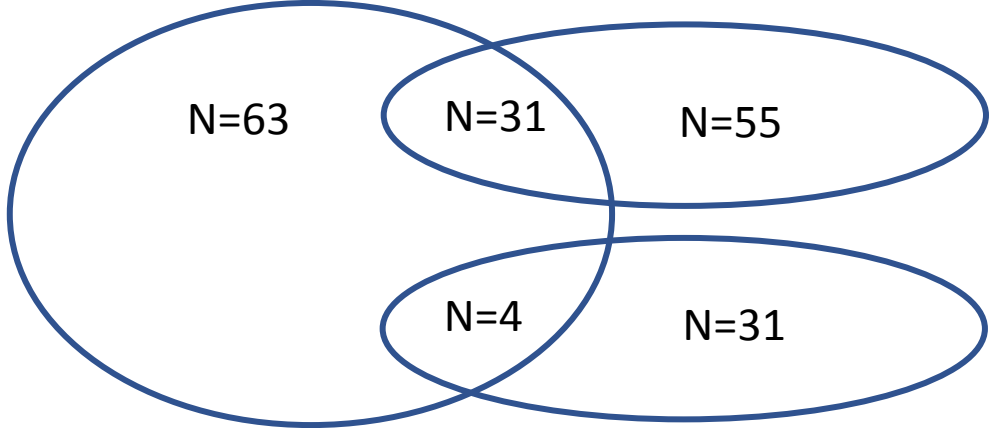

LOW

MEDIUM

HIGH

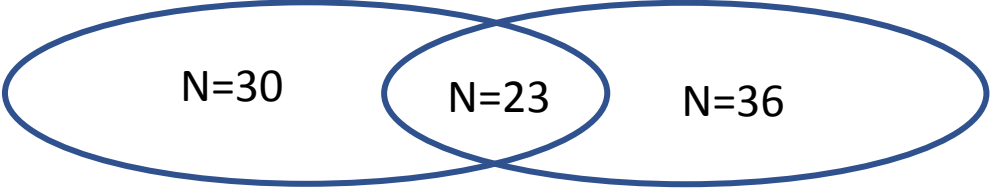

HIGH
